# Supplementary material
Source: Springer Nature journal article supplement (https://www.springermedizin.de/resource/supplementary/13075_2012_3656_MOESM3_ESM.pdf/9695066)

## CD40

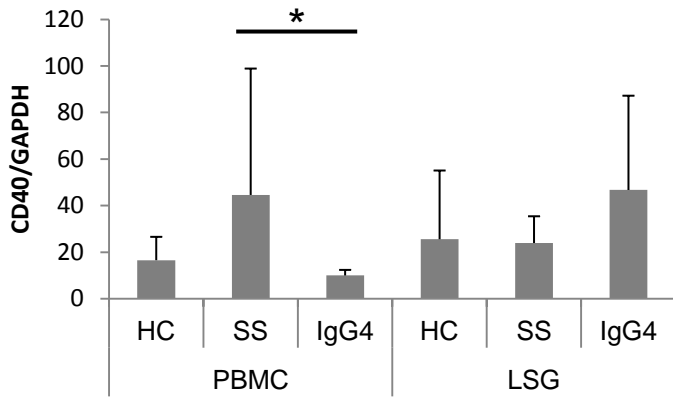

## CD154

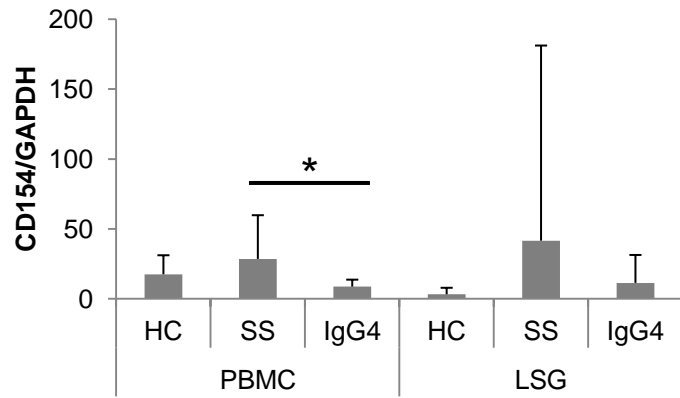

## BAFF

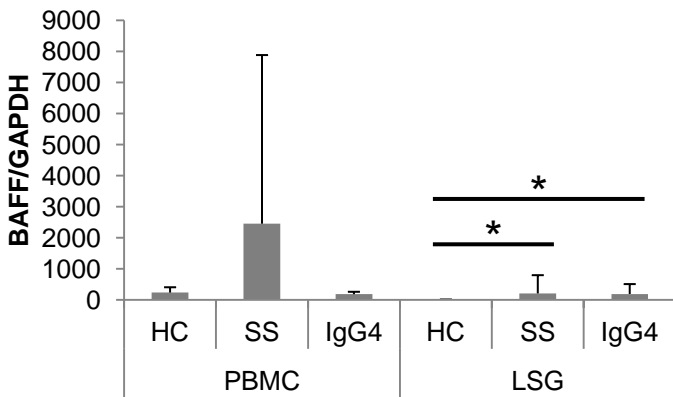

## APRIL

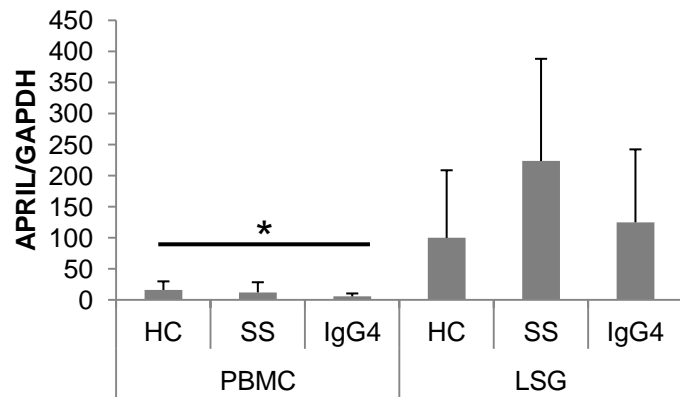

## IRF4

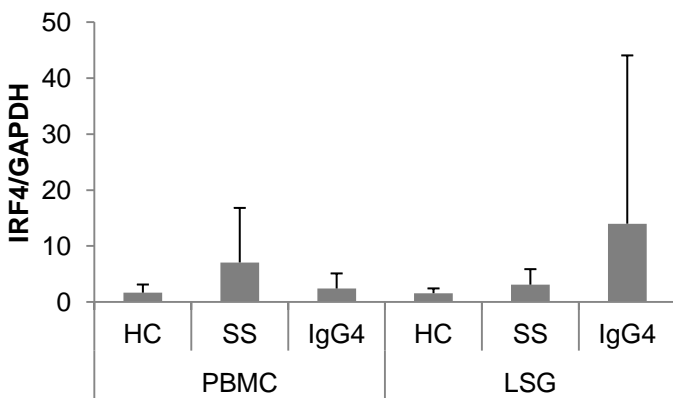

## AID

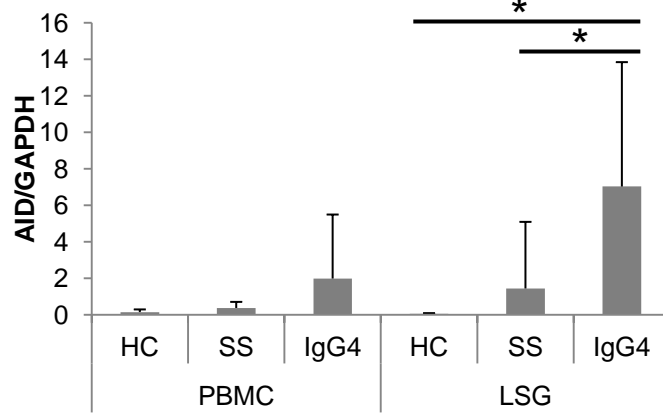

Supplement: MOESM3 [file 9695066]
